# Supplementary material
Source: PubMed Central journal article supplement (PMC4163041)

A

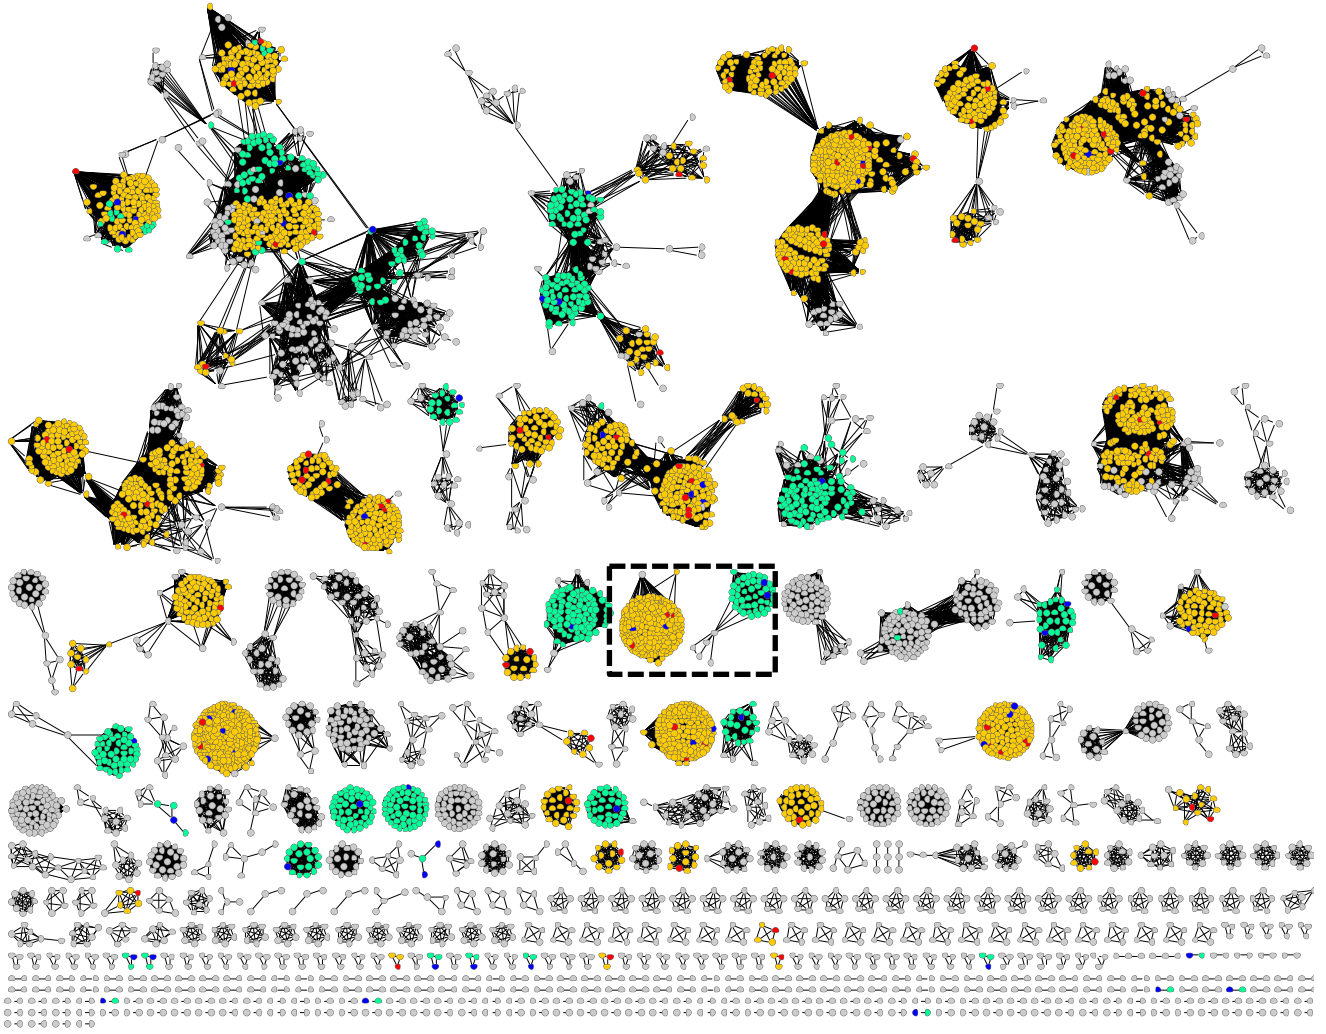

B

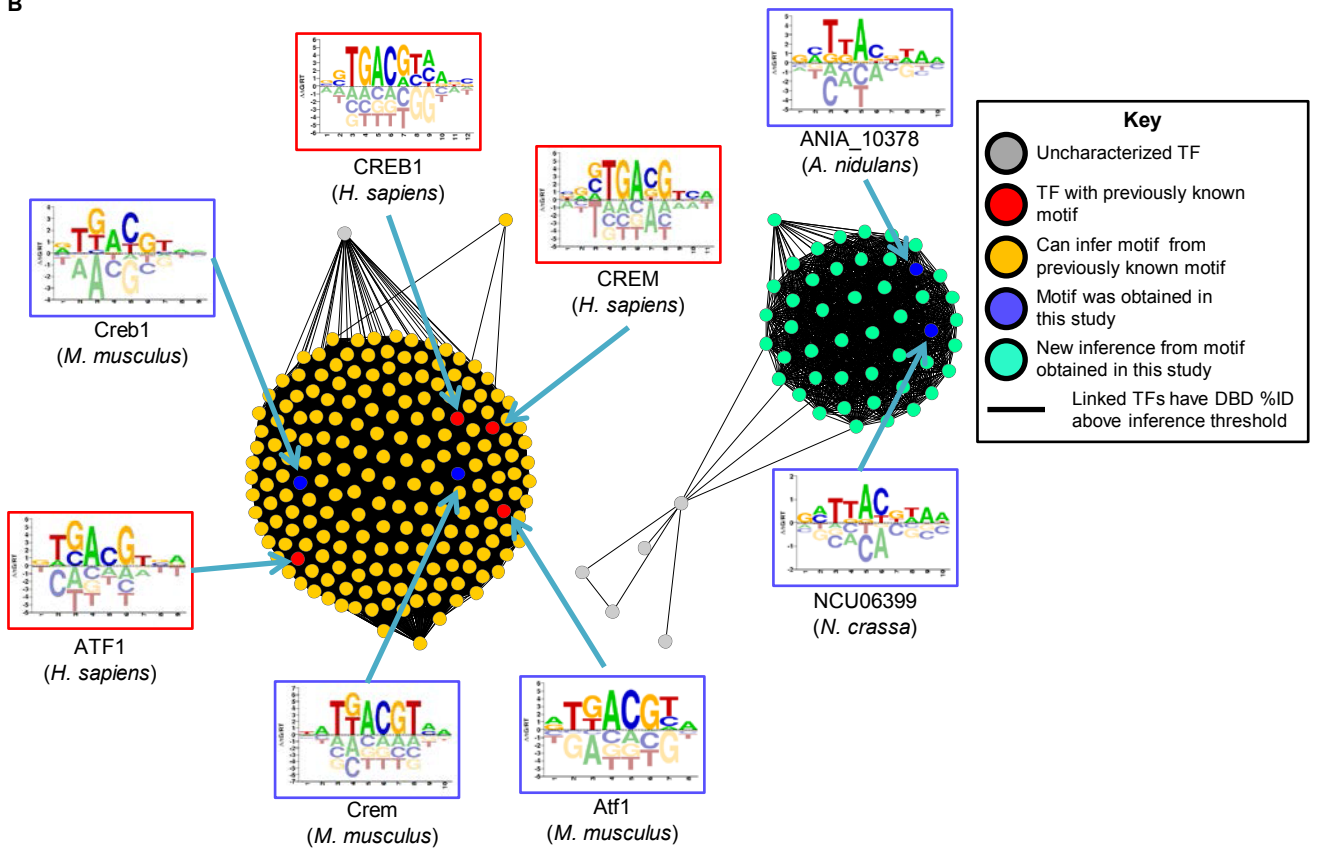

Supplement: NIHMS625903-supplement-3.pdf [file NIHMS625903-supplement-3.pdf]

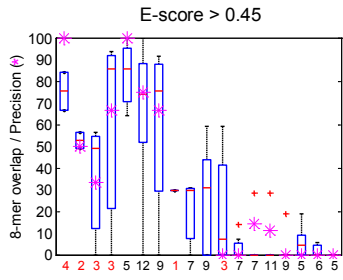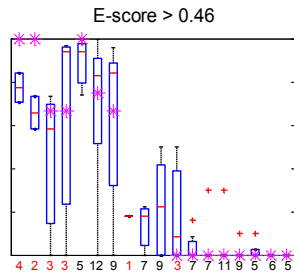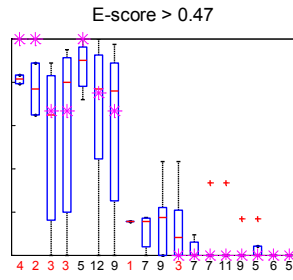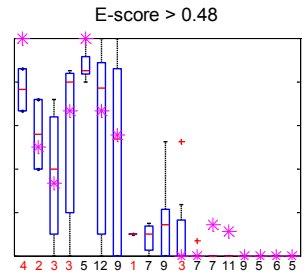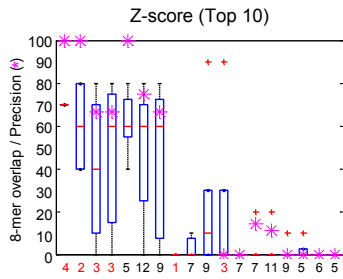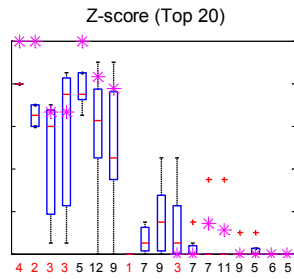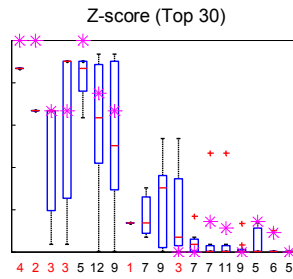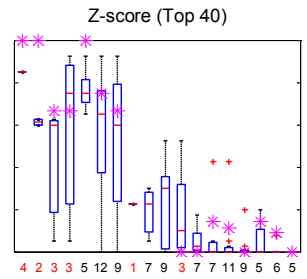

Supplement: NIHMS625903-supplement-4.pdf [file NIHMS625903-supplement-4.pdf]

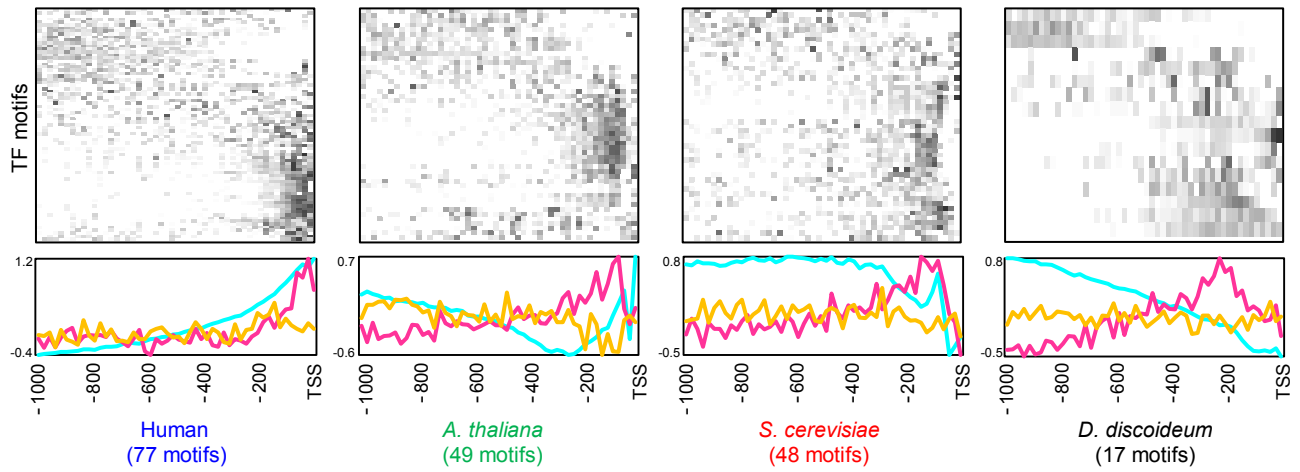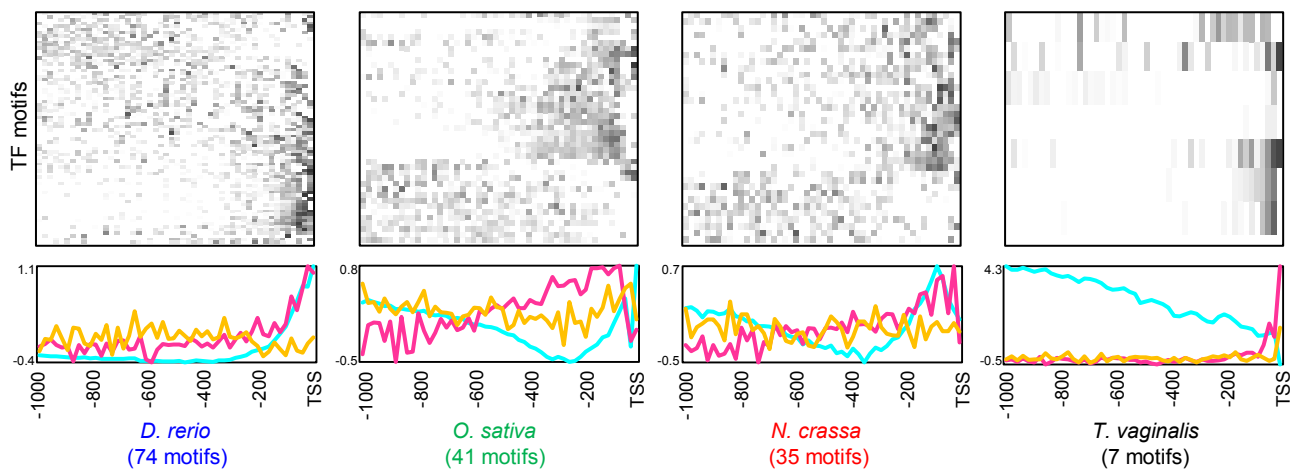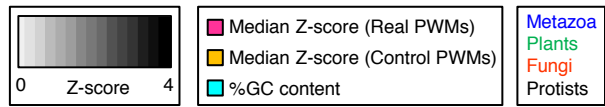

Supplement: NIHMS625903-supplement-6.pdf [file NIHMS625903-supplement-6.pdf]

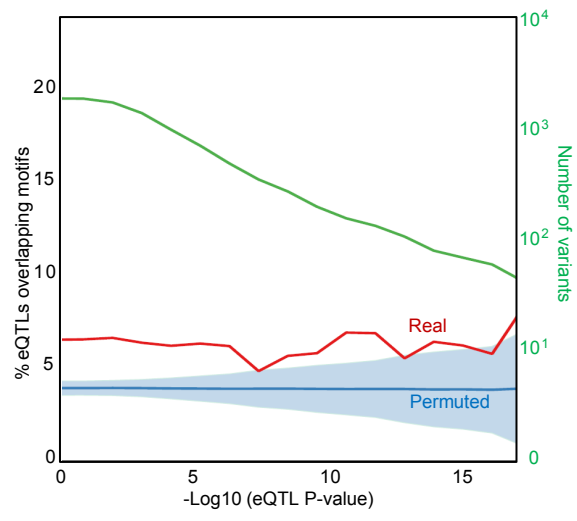

Supplement: NIHMS625903-supplement-7.pdf [file NIHMS625903-supplement-7.pdf]

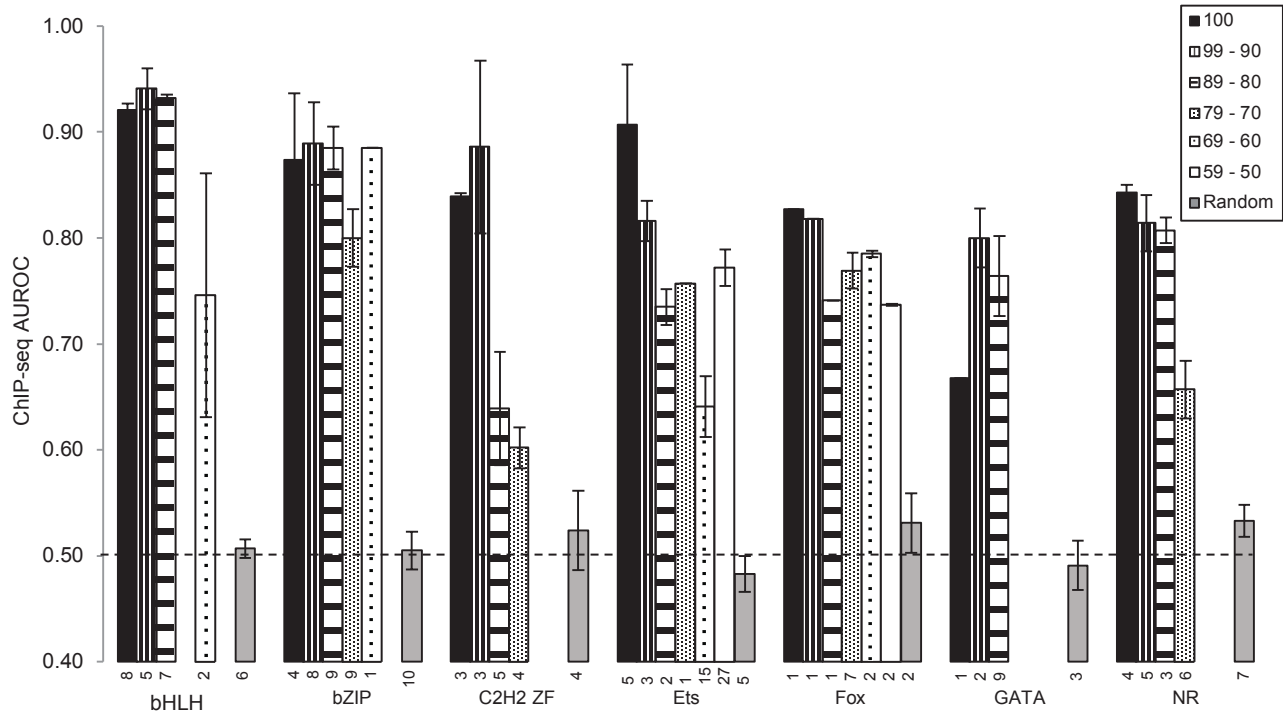

Supplement: NIHMS625903-supplement-9.pdf [file NIHMS625903-supplement-9.pdf]
